# Supplementary material
Source: publisher site journal article supplement (https://www.spandidos-publications.com/7908/downloadSupplementary)

Figure S1. Pathways affected in the ‘Regulation of the Epithelial Mesenchymal Transition by Growth Factors Pathway’, illustrating the relationships between various key molecules and their upstream and downstream interactions. Solid line, direct interaction; dashed line, indirect interaction. Arrow, activation; Blocked arrow, inhibition. Blue, leads to inhibition; Orange, leads to activation; Yellow, findings inconsistent with state of downstream molecule; Gray, effect not predicted.

Regulation of the epithelial mesenchymal transition by growth factors pathway

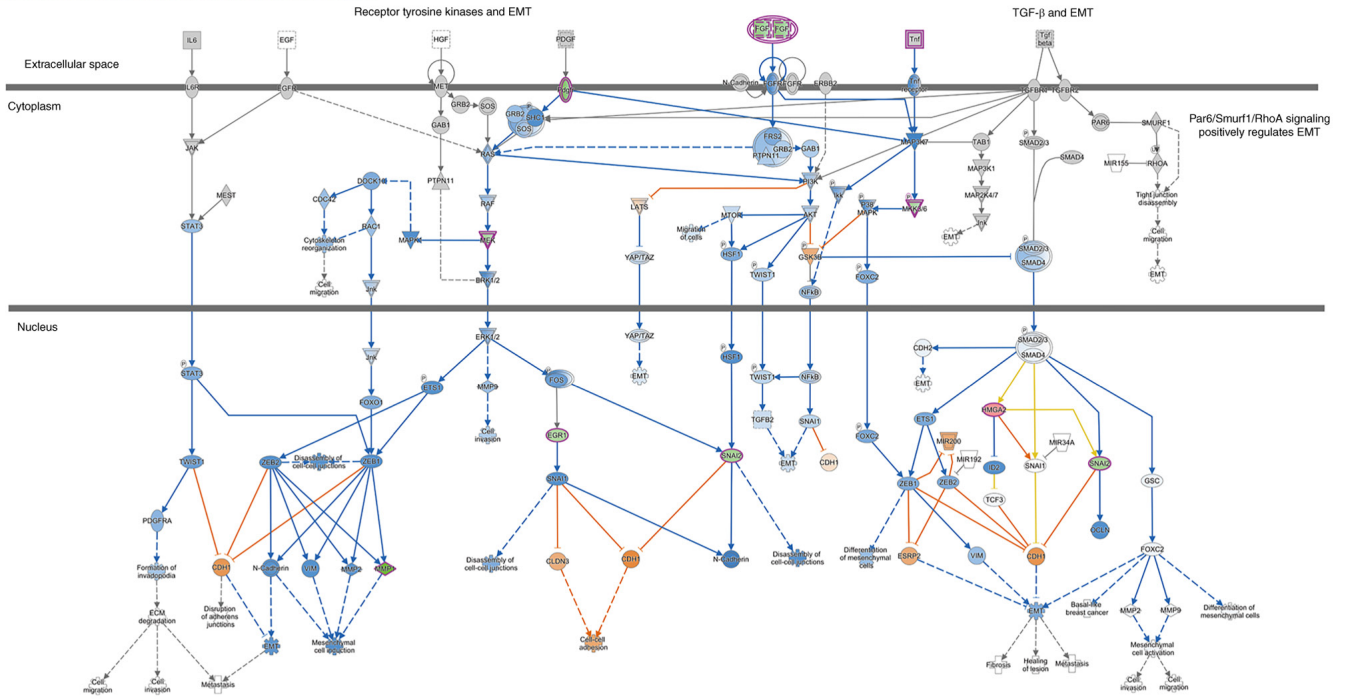

© 2000-2025 QIAGEN. All rights reserved.

Figure S2. Molecules impacted by the 'STAT3 Pathway' and their upstream and downstream relationships. Solid line, direct interaction; Dashed line, indirect interaction. Arrow, activation; Blocked arrow, inhibition. Blue, leads to inhibition; Orange, leads to activation; Yellow, findings inconsistent with state of downstream molecule; Gray, effect not predicted.

STAT3 Pathway

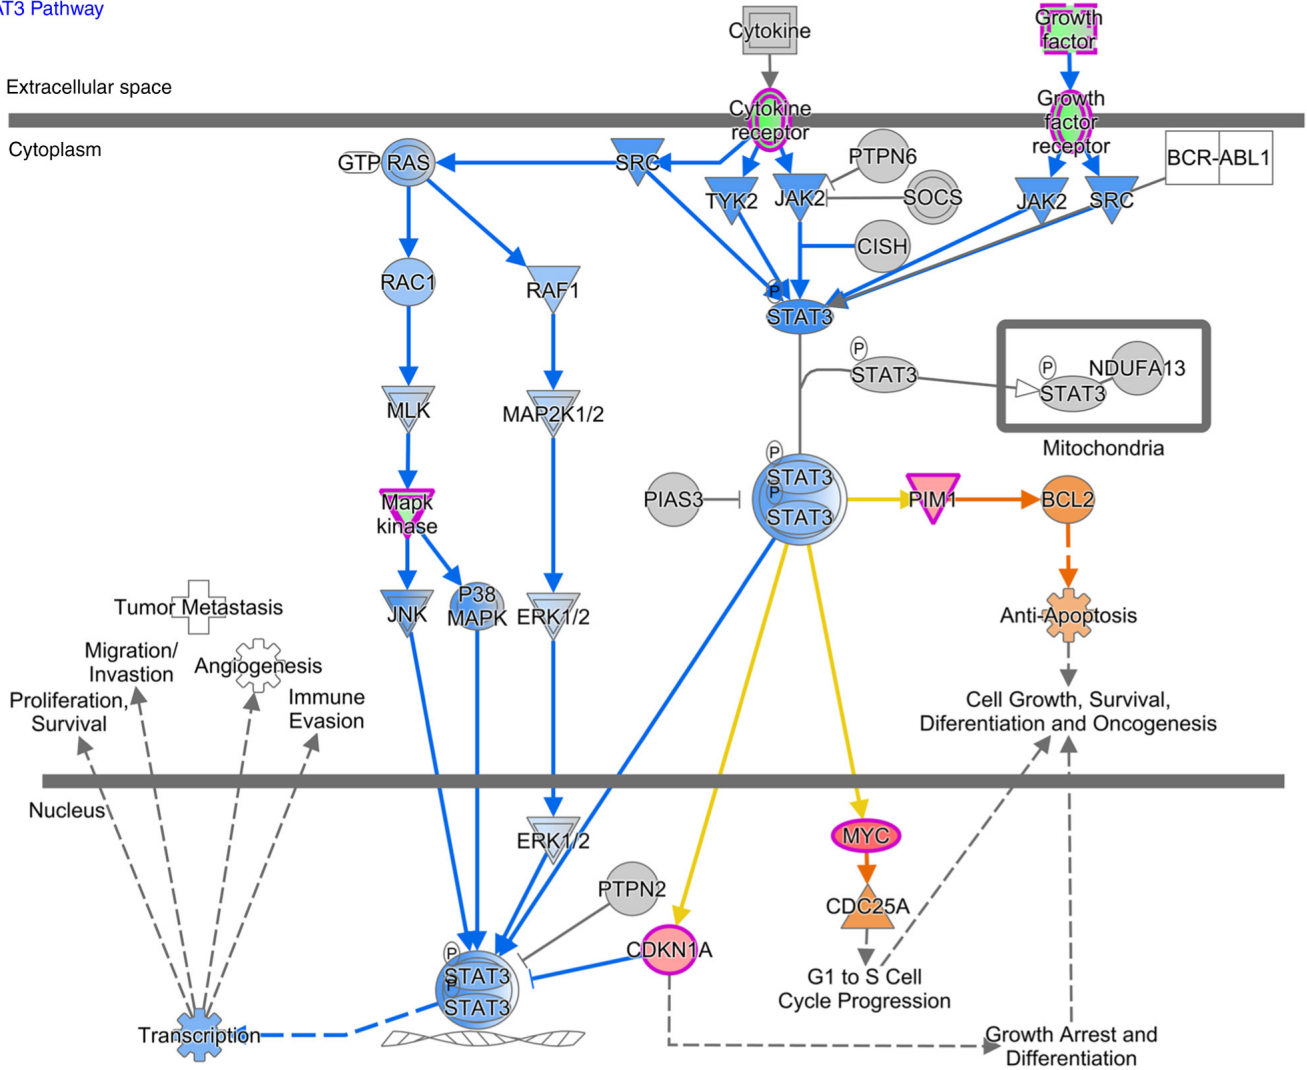

Figure S3. Molecules affected in the 'NOD1/2 signaling pathway' and their upstream and downstream interactions. Solid line, direct interaction; Dashed line, indirect interaction. Arrow, activation; Blocked arrow, inhibition. Blue, leads to inhibition; Orange, leads to activation; Yellow, findings inconsistent with state of downstream molecule; Gray, effect not predicted.

NOD1/2 Signaling pathway

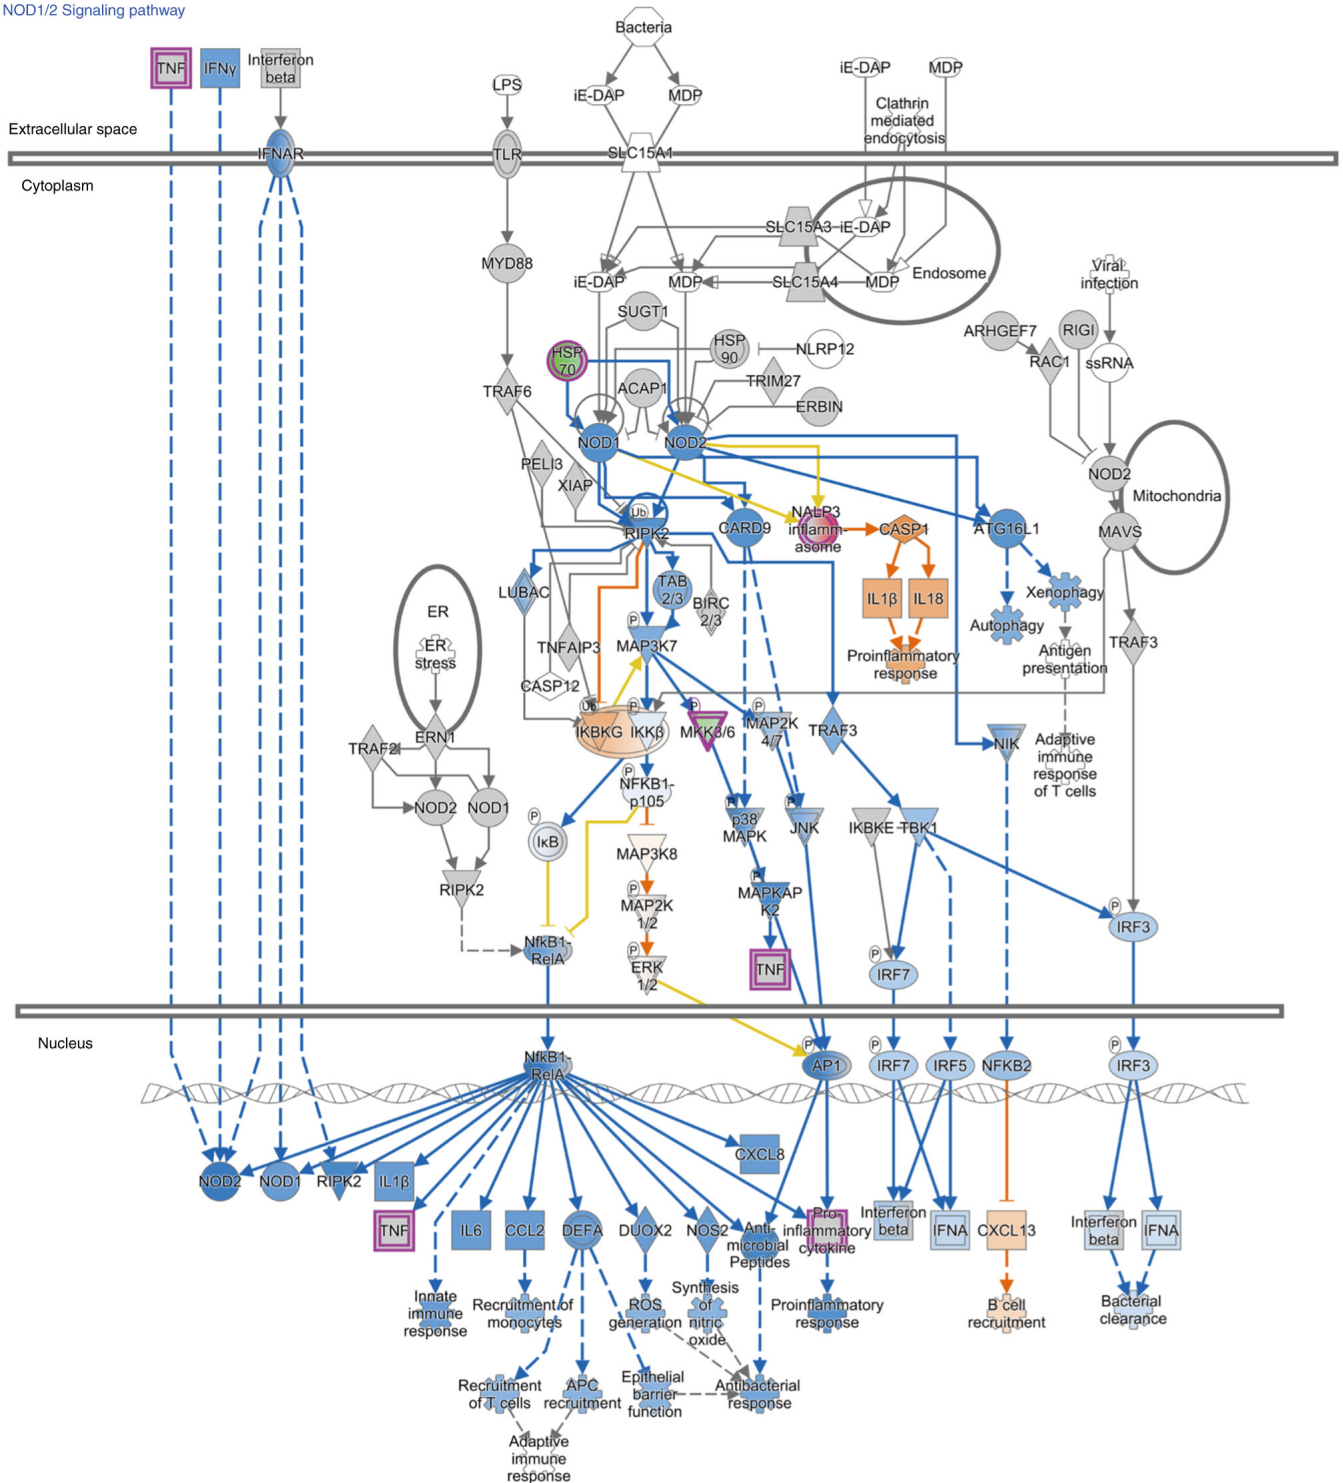

Supplement: Supplementary file 1 [file downloadSupplementary]
